# Supplementary material
Source: PubMed Central journal article supplement (PMC6901029)
Supplement: NIHMS1058199-supplement-supplemental.pdf [file NIHMS1058199-supplement-supplemental.pdf]

## Supplementary material

### Identification of a T follicular helper cell subset that drives anaphylactic IgE

Uthaman Gowthaman<sup>1,2</sup>, Jennifer S. Chen<sup>1,2</sup>, \*, Biyan Zhang<sup>1,2\*</sup>, William F. Flynn<sup>3</sup>, Yisi Lu<sup>2</sup>, Wenzhi Song<sup>2</sup>, Julie Joseph<sup>1</sup>, Jake A. Gertie<sup>1,2</sup>, Lan Xu<sup>1,2</sup>, Magalie A. Collet<sup>3</sup>, Jessica Grassmann<sup>3</sup>, Tregony Simoneau<sup>4</sup>, David Chiang<sup>5</sup>, M. Cecilia Berin<sup>5</sup>, Joseph E. Craft<sup>2</sup>, Jason S. Weinstein<sup>6</sup>, Adam Williams<sup>3,7\*†</sup>, Stephanie C. Eisenbarth<sup>1,2,\*†</sup>

#### Affiliations:

<sup>1</sup>Department of Laboratory Medicine, Yale University School of Medicine, New Haven, CT, 06520, USA.

<sup>2</sup>Department of Immunobiology, Yale University School of Medicine, New Haven, CT, 06520, USA.

<sup>3</sup>The Jackson Laboratory for Genomic Medicine, Farmington, CT 06030, USA.

<sup>4</sup>The Asthma Center, CT Children's Medical Center, Hartford, CT 06106

<sup>5</sup>Jaffe Food Allergy Institute/Immunology Institute, Icahn School of Medicine at Mount Sinai, New York, NY, USA

<sup>6</sup>Center for Immunity and Inflammation, Rutgers New Jersey Medical School, Newark, NJ, 07101, USA.

<sup>7</sup>The Department of Genetics and Genome Sciences, University of Connecticut Health Center, Farmington, CT 06032, USA.

\* Contributed equally

†Corresponding author. Email: [stephanie.eisenbarth@yale.edu](mailto:stephanie.eisenbarth@yale.edu) (S.C.E.); [adam.williams@jax.org](mailto:adam.williams@jax.org) (A.W.)

Fig. S1

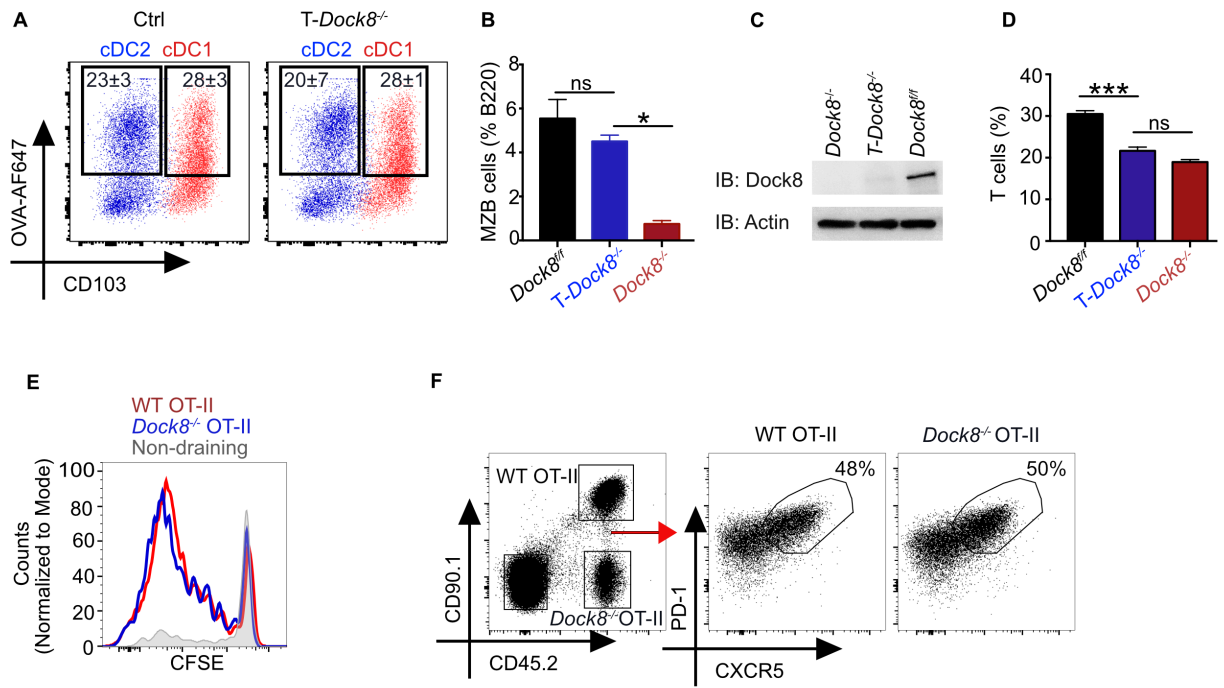

**Fig. S1. T-*Dock8*<sup>-/-</sup> mice have normal dendritic cell migration and T cell activation**

(A) Comparable frequency of OVA<sup>+</sup> migratory conventional dendritic cells type 1 (cDC1s) and type 2 (cDC2s) in MedLNs of T-*Dock8*<sup>-/-</sup> or control *Dock8*<sup>fl/fl</sup> mice 18 hr post intranasal (i.n.) immunization with LPS and OVA-AF647. (B) Splenic marginal zone B cell frequencies in *Dock8*<sup>fl/fl</sup>, T-*Dock8*<sup>-/-</sup>, or *Dock8*<sup>-/-</sup> mice. (C) DOCK8 immunoblot performed on purified CD4<sup>+</sup> T cells from *Dock8*<sup>-/-</sup>, T-*Dock8*<sup>-/-</sup>, and control *Dock8*<sup>fl/fl</sup> mice. (D) Splenic T cell frequencies in *Dock8*<sup>fl/fl</sup>, T-*Dock8*<sup>-/-</sup>, or *Dock8*<sup>-/-</sup> mice. (E-F) *Dock8*<sup>-/-</sup> CD4<sup>+</sup> OVA-specific T cells (OT-II cells) show normal proliferation and Tfh differentiation. (E) Congenically marked *Dock8*<sup>WT</sup> and *Dock8*<sup>-/-</sup> OT-II cells were labeled with CFSE and co-transferred into naïve recipients, which were immunized with LPS and NP-OVA i.n. Three days later, proliferation was assessed by CFSE dye dilution. (F) Tfh cell differentiation of *Dock8*<sup>WT</sup> and *Dock8*<sup>-/-</sup> OT-II cells was assessed 6 days post immunization. Numbers in flow cytometry plots indicate percentage. Statistical tests: ANOVA (B, D). \**P*<0.05, \*\*\**P*<0.001. Data representative of at least two independent experiments with 2-3 mice per group.

Fig. S2

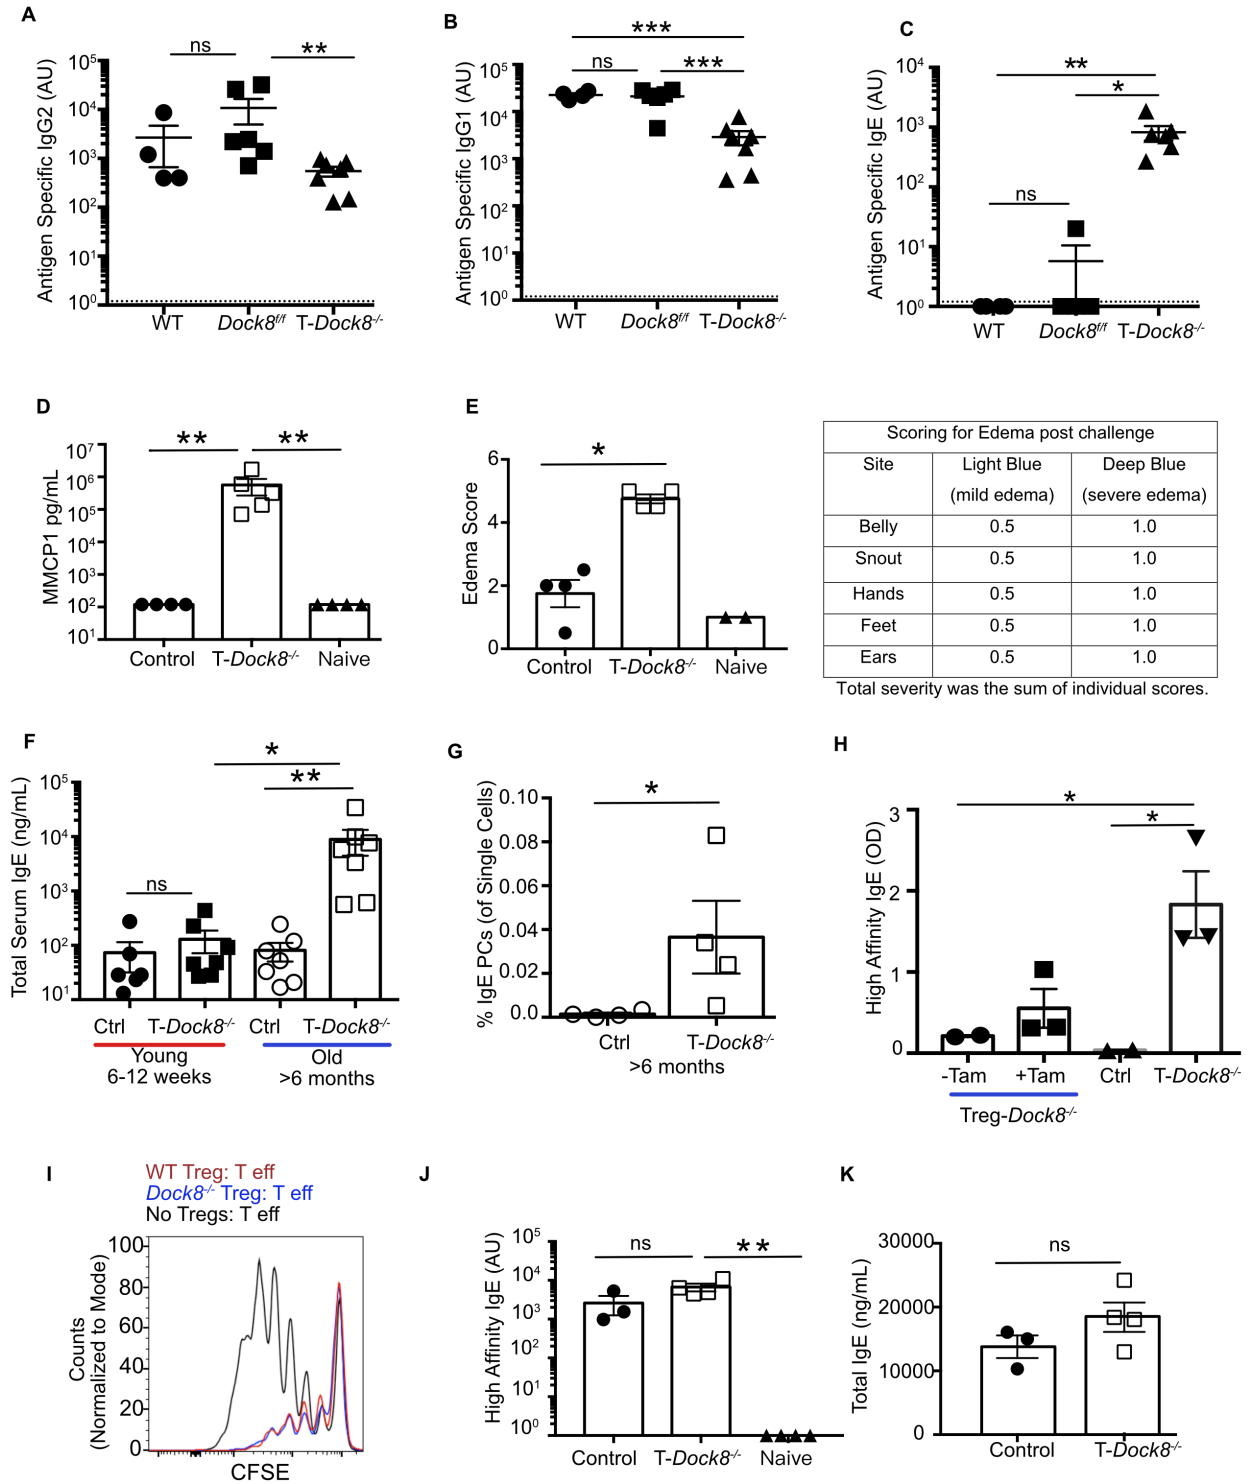

**Fig. S2. T-*Dock8*<sup>-/-</sup> mice have a hyper IgE state**

WT, *Dock8*<sup>fl/fl</sup>, or T-*Dock8*<sup>-/-</sup> mice were immunized i.n. with LPS and NP16-OVA and boosted twice with NP16-OVA. NP16-OVA-specific antibody responses on day 8 post boost were quantitated by ELISA for (A) IgG2c, (B) IgG1, and (C) IgE isotypes. (D) LPS+OVA immunized and boosted T-*Dock8*<sup>-/-</sup> or control (*Dock8*<sup>fl/fl</sup>) mice were challenged intraperitoneally (i.p.) with NP7-BSA. Plasma was collected thirty minutes post challenge and mouse mast cell protease 1 (MMCP-1) levels were measured by ELISA. (E) LPS and NP16-OVA immunized and boosted mice were challenged i.p. with NP7-BSA in 0.2% Evans blue. Forty minutes later, mice were evaluated for edema as described in the adjacent scoring scheme. (F) Total IgE levels in the sera from young or old naïve T-*Dock8*<sup>-/-</sup> or control (*Dock8*<sup>fl/fl</sup>) mice. (G) Frequency of CD138<sup>+</sup> IgE<sup>+</sup> plasma cells in mesenteric lymph nodes of aged T-*Dock8*<sup>-/-</sup> or control mice. (H) *Dock8*<sup>fl/fl</sup> Foxp3-EGFP-cre-ERT2 (Treg-*Dock8*<sup>-/-</sup>), T-*Dock8*<sup>-/-</sup>, or *Dock8*<sup>fl/fl</sup> (Ctrl) mice were immunized and boosted with LPS and NP16-OVA i.n. as described. Day 8 post boost high-affinity IgE was quantitated by ELISA using NP7-BSA-coated plates. *Dock8* was inducibly deleted in Treg-*Dock8*<sup>-/-</sup> mice by administering tamoxifen (Tam) (1 mg/day/mouse) in corn oil through oral gavage on three consecutive days before every immunization. (I) Tregs from CD45.2 *Dock8*<sup>-/-</sup> or WT mice were cultured with naïve CFSE-labeled CD45.1<sup>+</sup> WT CD4<sup>+</sup> T cells at a ratio of 1:2 in the presence of  $\alpha$ -CD3 and  $\alpha$ -CD28 for 4 days. Proliferation was assessed by CFSE dye dilution gated on CD45.1<sup>+</sup> CD4<sup>+</sup> T effectors. (J-K) T-*Dock8*<sup>-/-</sup> or control (*Dock8*<sup>fl/fl</sup>) mice were immunized with *Alternaria* extract and NP16-Ova (Alt+OVA) and boosted twice as described in the methods. Day 8 sera from boosted mice were analyzed by ELISA for (J) high-affinity IgE using NP7-BSA-coated plates and (K) total IgE. Each symbol indicates an individual mouse. Error bars indicate SEM. Dotted lines in bar graphs represent background readings of sera from naïve mice. Statistical tests: Kruskal–Wallis *H* test (A, C, D, E, F, H, J); ANOVA (B); Student's *t*-test (G, K). \**P*<0.05,

**\*\*** $P < 0.01$ , **\*\*\*** $P < 0.001$ , and ns is not significant. Data representative of two independent experiments with 2-8 mice per group.

Fig. S3

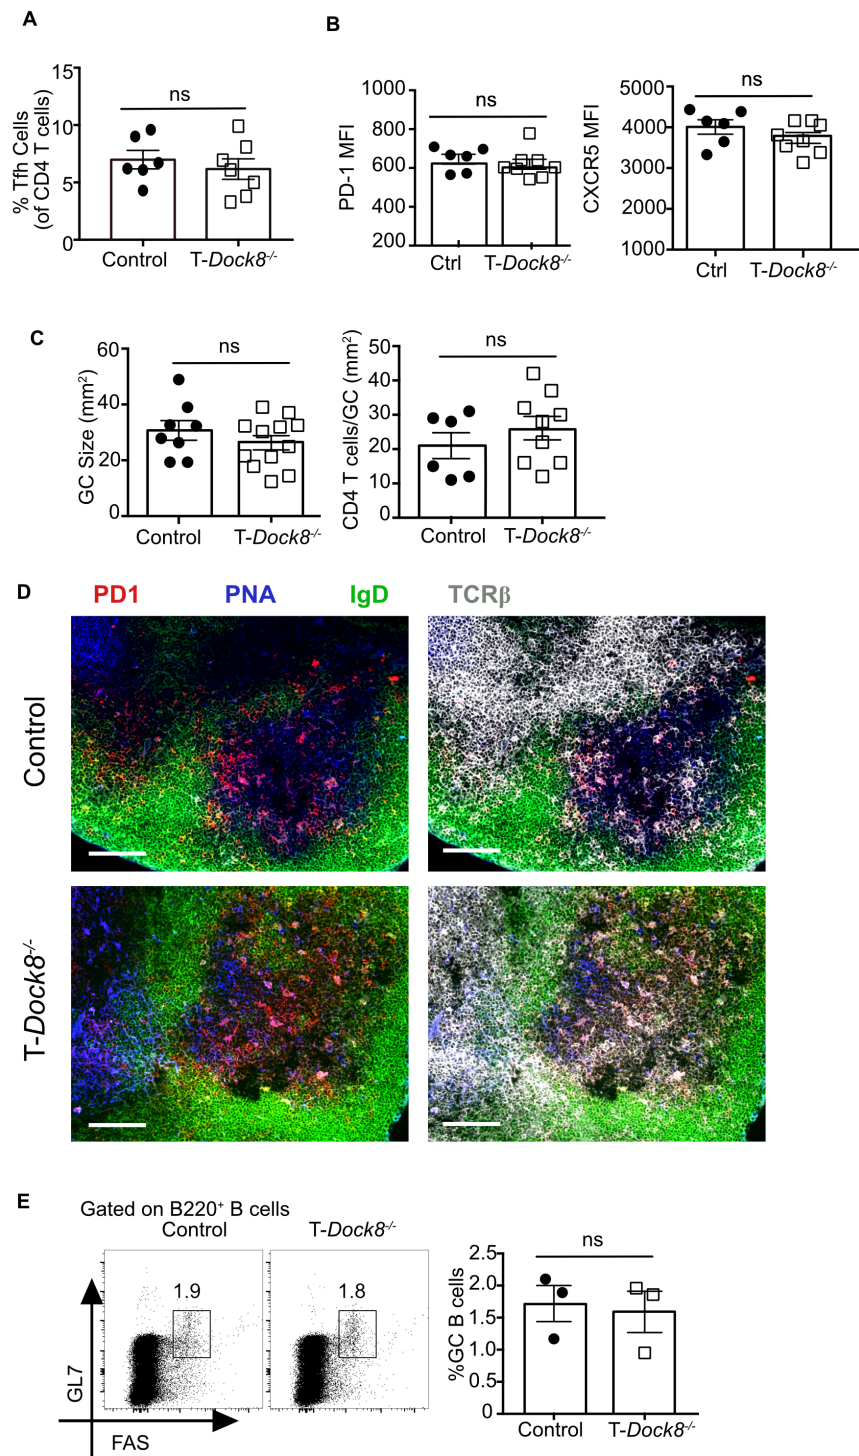

**Fig. S3. Tfh cells and germinal centers in T-*Dock8*<sup>-/-</sup> mice**

T-*Dock8*<sup>-/-</sup> and control (*Dock8*<sup>fl/fl</sup>) mice were immunized i.n. with LPS and NP16-OVA and analyzed for (A) frequency of day 8 Tfh cells and (B) PD-1 and CXCR5 expression on Tfh cells by flow cytometry. (C) Quantification of germinal centers size Tfh cells in GCs as analyzed by confocal microscopy on sections from day 9 MedLN as in Fig 1G. (D) Day 8 immunofluorescent images of GCs from the MedLN of LPS+OVA immunized T-*Dock8*<sup>-/-</sup> and *Dock8*<sup>fl/fl</sup> (control) mice. PD-1 (red), PNA (blue), IgD (green), TCRβ (white). Scale bar: 100 μM. (E) Frequency of day 8 GC B cells by flow cytometry. Each symbol indicates an individual mouse. Statistical tests: Student's *t*-test. Error bars indicate SEM. ns is not significant. Data representative of at least two independent experiments with 3-7 mice per group.



Fig. S4

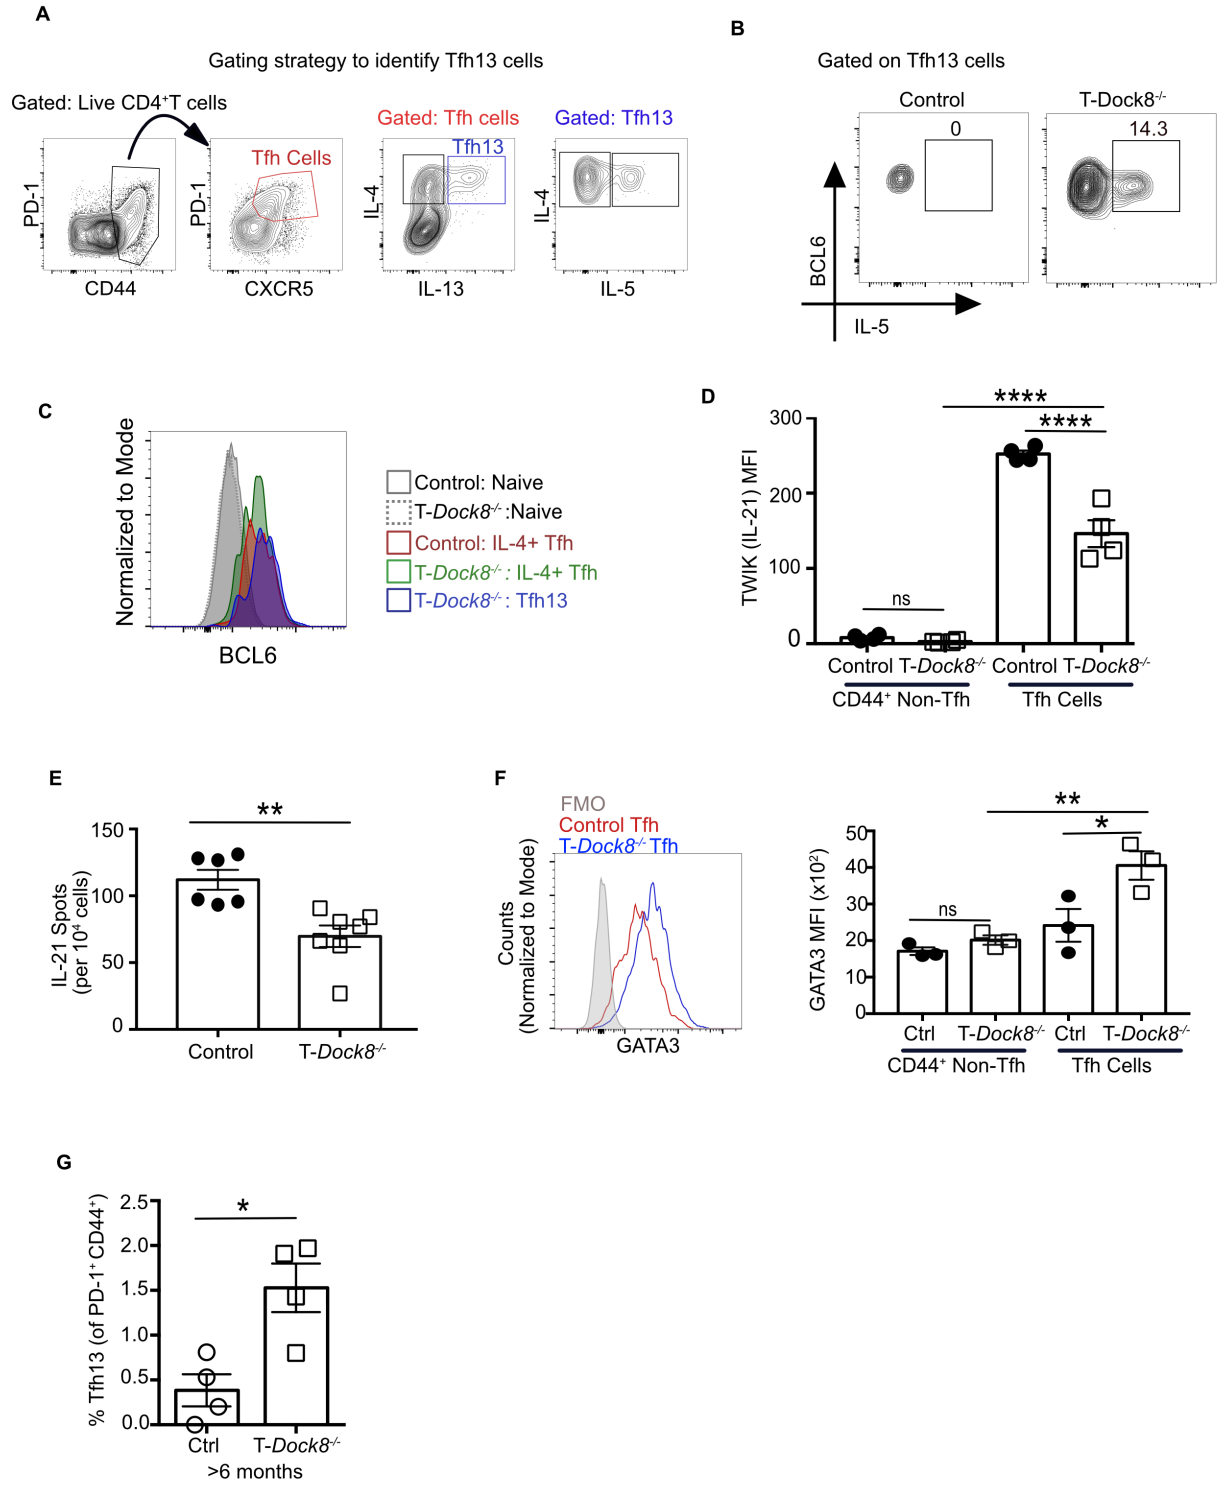

**Fig. S4. Characterization of Tfh13 cells in T-*Dock8*<sup>-/-</sup> mice**

(A) Gating strategy to identify Tfh13 cells. (B) T-*Dock8*<sup>-/-</sup> and control (*Dock8*<sup>fl/fl</sup>) mice were immunized i.n. with LPS and NP16-OVA and analyzed for (B) IL-5 expression by day 8 Tfh13 cells and (C) BCL6 expression in cytokine-producing Tfh cell subsets. (D) IL-21 reporter expression in MedLN Tfh cells from IL-21 TWIK reporter T-*Dock8*<sup>-/-</sup> or control TWIK *Dock8*<sup>fl/fl</sup> reporter mice on day 8 post immunization. (E) IL-21 ELISpot of Tfh cells sorted from T-*Dock8*<sup>-/-</sup> or control (*Dock8*<sup>fl/fl</sup>) mice at day 7 post immunization. (F) GATA3 expression in Tfh cells from T-*Dock8*<sup>-/-</sup> or control (*Dock8*<sup>fl/fl</sup>) mice post immunization is shown as histogram overlay (left) and as bar graphs (right). (G) Frequency of Tfh13 cells in mesenteric lymph nodes of aged T-*Dock8*<sup>-/-</sup> or control mice. Each symbol indicates an individual mouse. Error bars indicate SEM. Statistical tests: ANOVA (C, F); Mann–Whitney *U* test (E); Student’s *t*-test (G). \**P*<0.05, \*\**P*<0.01, \*\*\**P*<0.001, \*\*\*\**P*<0.0001, and ns is not significant. Data representative of at least two independent experiments with 3-7 mice. FMO, fluorescence minus one control for GATA3 staining.

Fig. S5

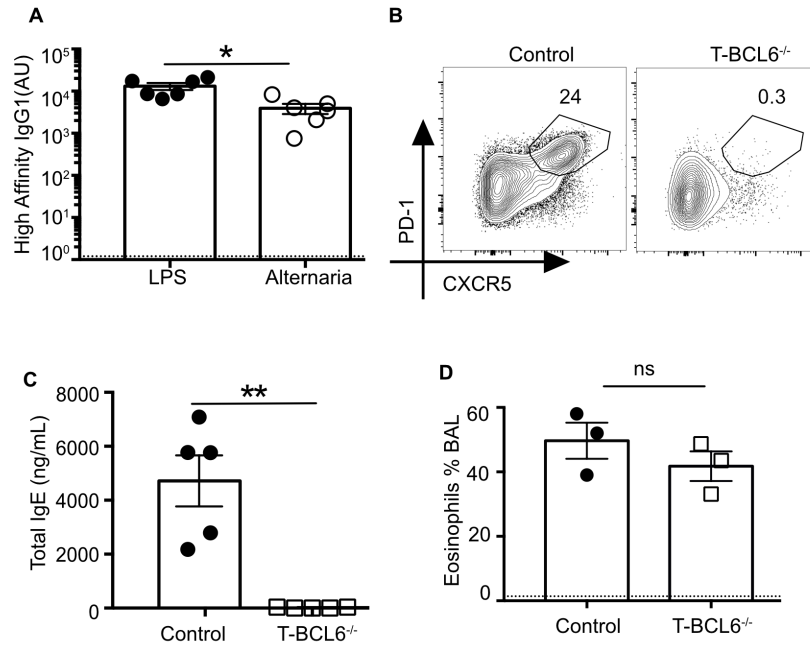

**Fig. S5. Characterization of type 2 responses to *Alternaria* in WT and T-*Bcl6*<sup>-/-</sup> mice**

(A) WT C57BL/6 mice were immunized intranasally (i.n.) with LPS or *Alternaria* extract and NP16-OVA and boosted as described. Day 8 sera from boosted mice were analyzed by ELISA with NP7-BSA-coated plates for high-affinity IgG1. (B-C) Frequency of Tfh cells from *Cd4*<sup>Cre</sup>*Bcl6*<sup>fl/fl</sup> (T-*Bcl6*<sup>-/-</sup>) mice or controls (*Bcl6*<sup>fl/fl</sup>) that were immunized with *Alternaria* extract and NP16-OVA. (C) T-*Bcl6*<sup>-/-</sup> or control (*Bcl6*<sup>fl/fl</sup>) mice were immunized and boosted with *Alternaria* extract and NP16-OVA. Data depict total serum IgE day 8 post-boost. (D) Bronchoalveolar lavage (BAL) eosinophilia in T-*Bcl6*<sup>-/-</sup> or control (*Bcl6*<sup>fl/fl</sup>) mice that were immunized and challenged with *Alternaria* extract and NP16-OVA. Each symbol indicates an individual mouse. Data representative of 3-6 mice per group. Error bars indicate SEM. Dotted lines in bar graphs represent background readings of sera or BAL eosinophils from naïve mice. Statistical tests: Student's *t*-test (A, D); Mann-Whitney *U* test (C). \**P*<0.05, \*\**P*<0.01, and ns is not significant.

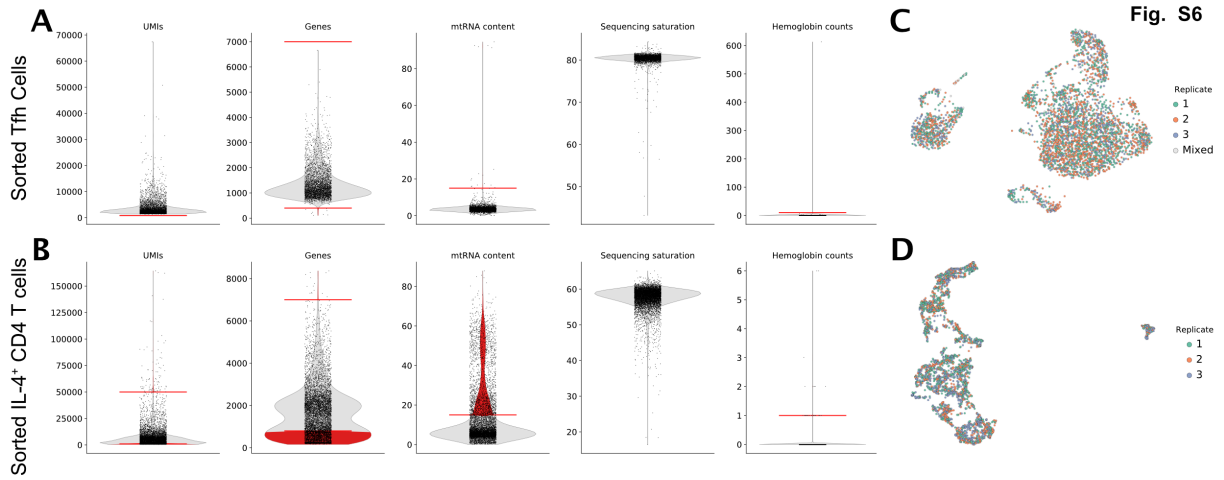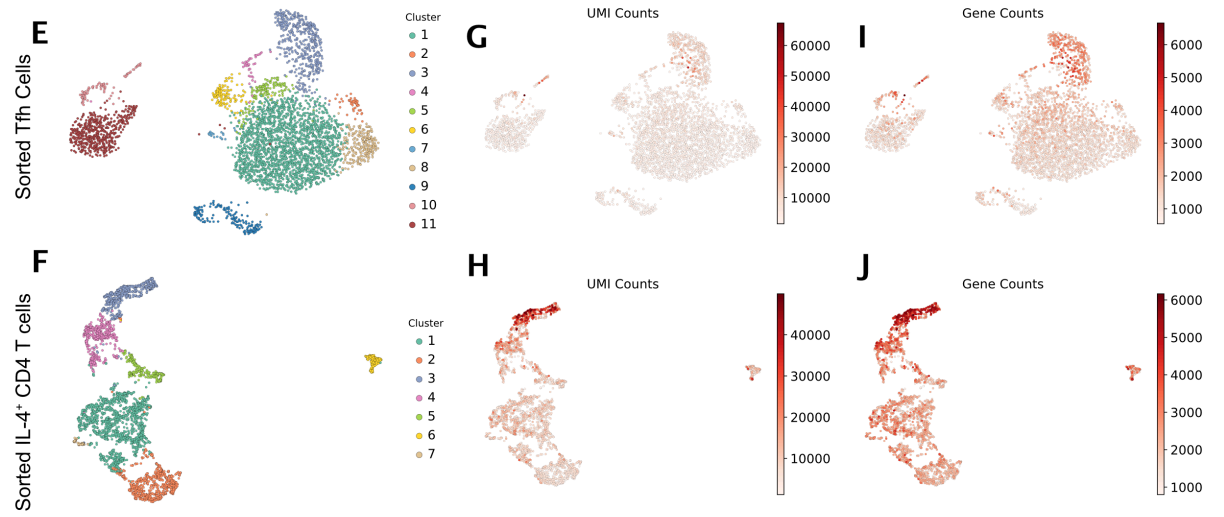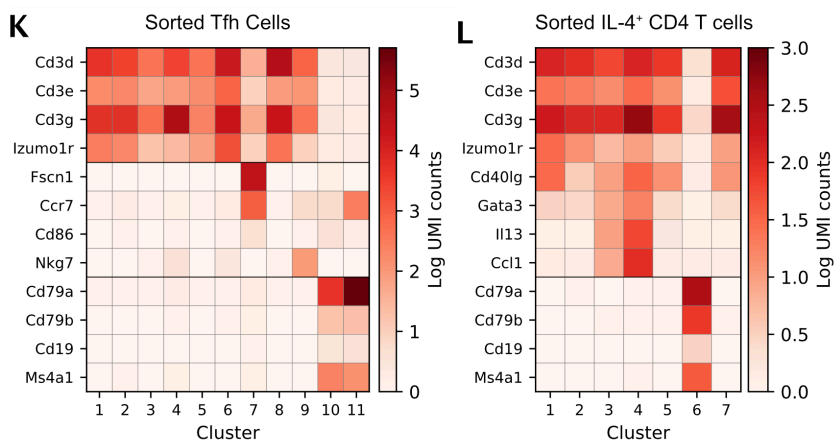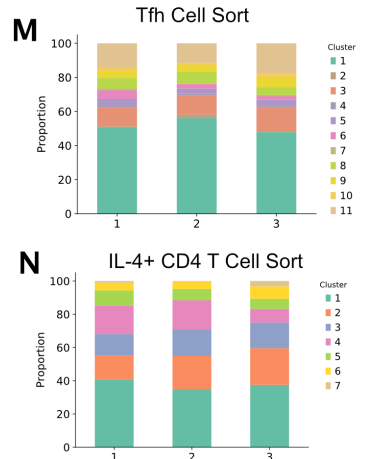

### **Fig. S6. scRNA-seq QC analysis**

(A-B) Violin plots showing 5 per-cell metrics used to gauge the quality of individual single-cells from either sorted Tfh cells or *Ii4*-expressing (4get+) activated T cells scRNA-seq runs: UMI counts, gene counts, fraction of the captured transcripts mapped to mtRNA, per-cell sequencing saturation, and cumulative expression of 10 hemoglobin genes. Red horizontal lines show the thresholds above or below which were used to exclude cells for each criterion; sequencing saturation was not used to filter cells. More stringent filtering criteria were used for the second sample. (C-J) 2D UMAP embedding of the single-cell expression profiles from both scRNA-seq runs labeled by (C-D) biological replicate as determined by cell-hashing (82), (E-F) cluster assigned by the Leiden community detection algorithm, (G-H) total UMI counts per cell, and (I-J) gene counts per cell. (K-L) Matrix plots showing the log-transformed normalized expression of representative marker genes to identify the T-cell populations of interest and remove B-cells, monocytes, and NK cells. Gene expression is colored relative to the highest expressed gene shown in each matrix. (M-N) Bar plots showing the proportion of cells in each cluster from each biological replicate from each scRNA-seq run, respectively.

Fig. S7

A

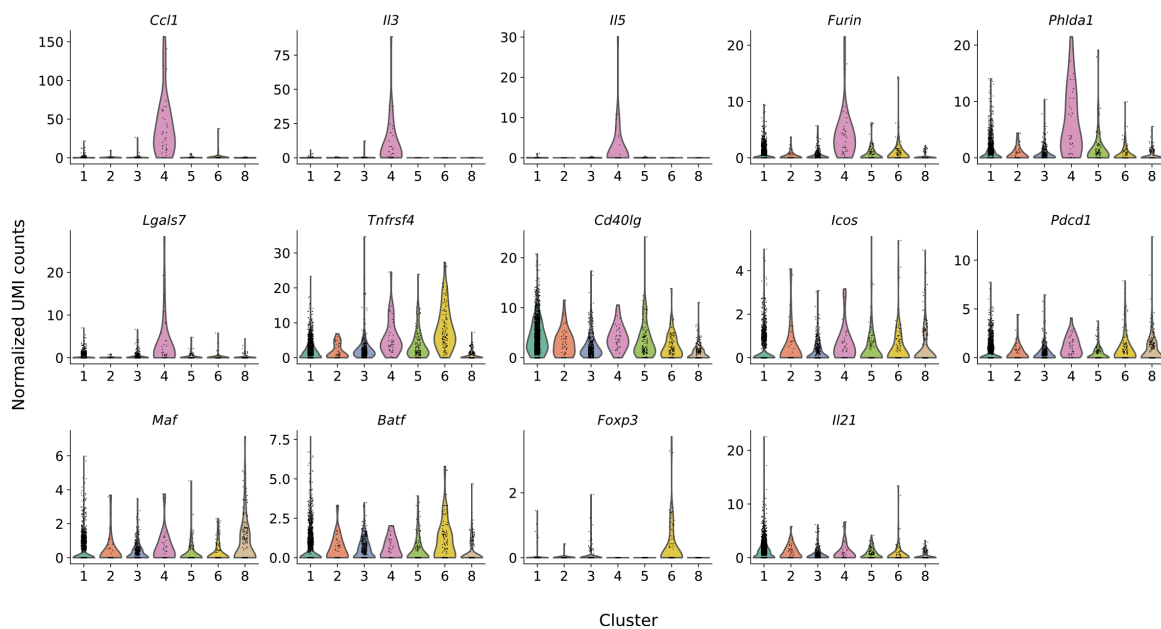

B

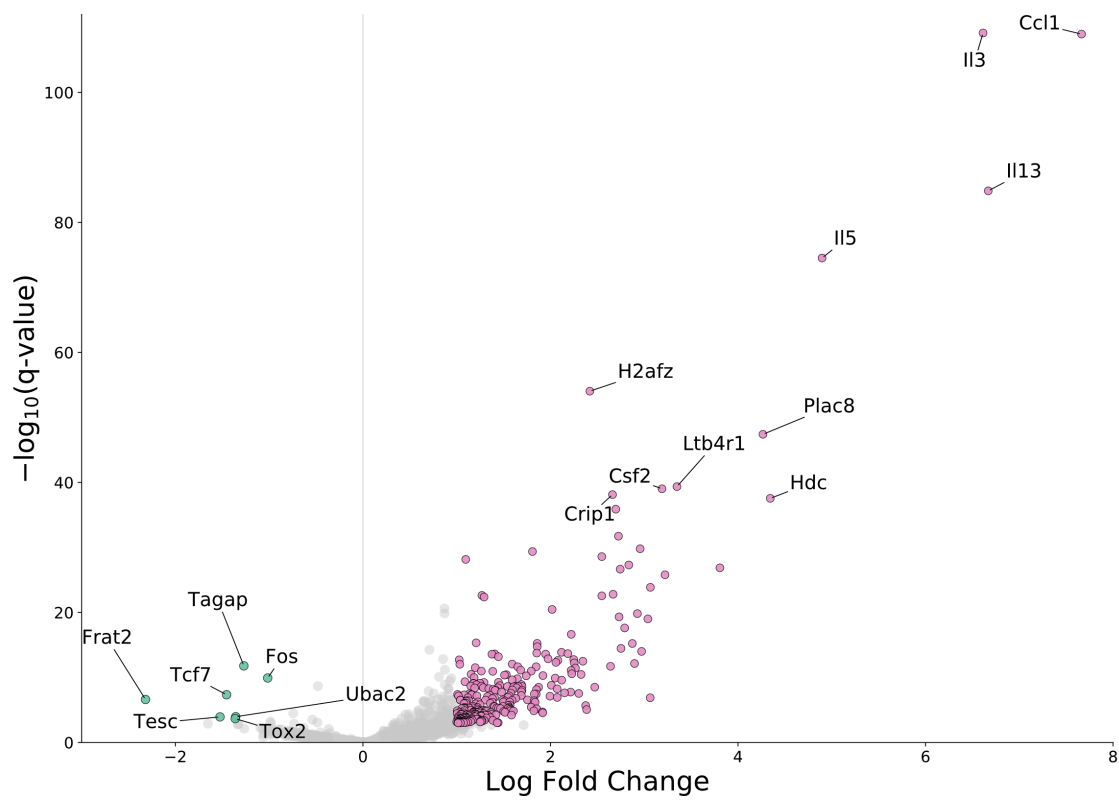

**Fig. S7. Differentially expressed genes between Tfh2 and Tfh13 cells**

(A) Violin plots showing the expression of *Ccl1*, *Il3*, *Il5*, *Furin*, *Phlda1*, *Lgals7*, *Tnfrsf4* (OX40), *Cd40lg* (CD40L), *Icos*, *Pdcd1* (PD-1), *Maf* (c-Maf), *Batf*, *Foxp3*, and *Il21* in the seven Tfh cell clusters. (B) Volcano plot showing differentially expressed genes (DEGs) between clusters 1 (Tfh2 cells) and 4 (Tfh13 cells). The horizontal axis shows the  $\log_2$ -fold change in mean expression between the two clusters and the vertical axis shows the  $\log_{10}$  adjusted *P*-value (Benjamini-Hochberg correction) given by a likelihood ratio test. Genes that are more highly expressed in cluster 4 have positive log-fold change. The 7 and 10 most significant DEGs for clusters 1 and 4 are labeled.



Fig. S8

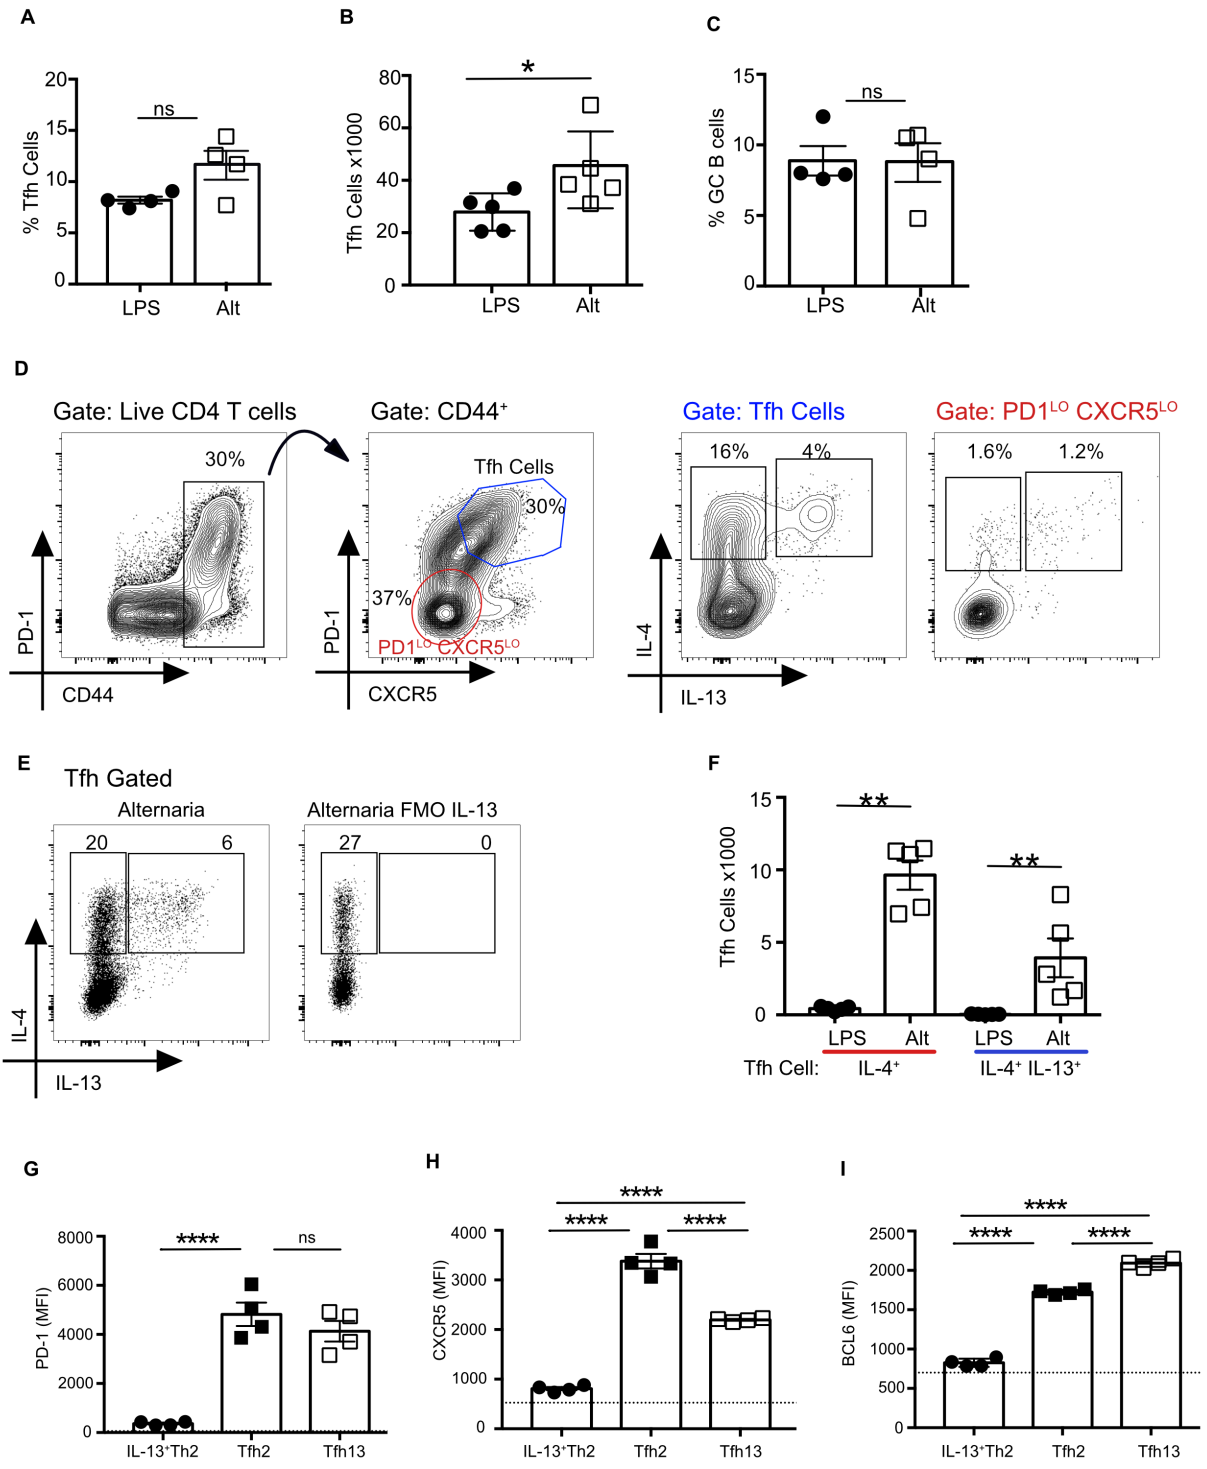

**Fig. S8. Characterization of Tfh13 cells induced to Alternaria extract in WT mice**

WT C57BL/6 mice were immunized with LPS+OVA or Alt+OVA and Tfh cells were analyzed by flow cytometry 8 days later. (A) Tfh cell frequencies and (B) numbers post immunization. (C) Frequency of GC B cells (PNA<sup>+</sup> IgD<sup>-</sup>). (D) Gating strategy to identify Tfh cells (PD-1<sup>+</sup> CXCR5<sup>+</sup>) and effectors (PD-1<sup>lo</sup> CXCR5<sup>lo</sup>) that make cytokines IL-4 and IL-13. Samples were stimulated with PMA+Ionomycin and stained for cytokines as described in methods. (E) Unstained (FMO) control for IL-13 staining. (F) Absolute counts of Tfh2 and Tfh13 cells induced in LPS+OVA or Alt+OVA day 8 post immunization. (G-H) Expression of (G) PD-1, (H) CXCR5 and (I) BCL6 in Tfh2, Tfh13 and IL-13<sup>+</sup> Th2 (gated as in D using intracellular cytokine staining). Dotted lines indicate MFI of naïve CD4 T cells. Each symbol indicates an individual mouse. Error bars indicate SEM. Data representative of two to three experiments with 3-5 mice per group. Statistical tests: Student's *t*-test (A-C); Mann-Whitney *U* test (F); ANOVA (G-I). \**P*<0.05, \*\**P*<0.01, \*\*\**P*<0.001, \*\*\*\**P*<0.0001, and ns is not significant.

Fig. S9

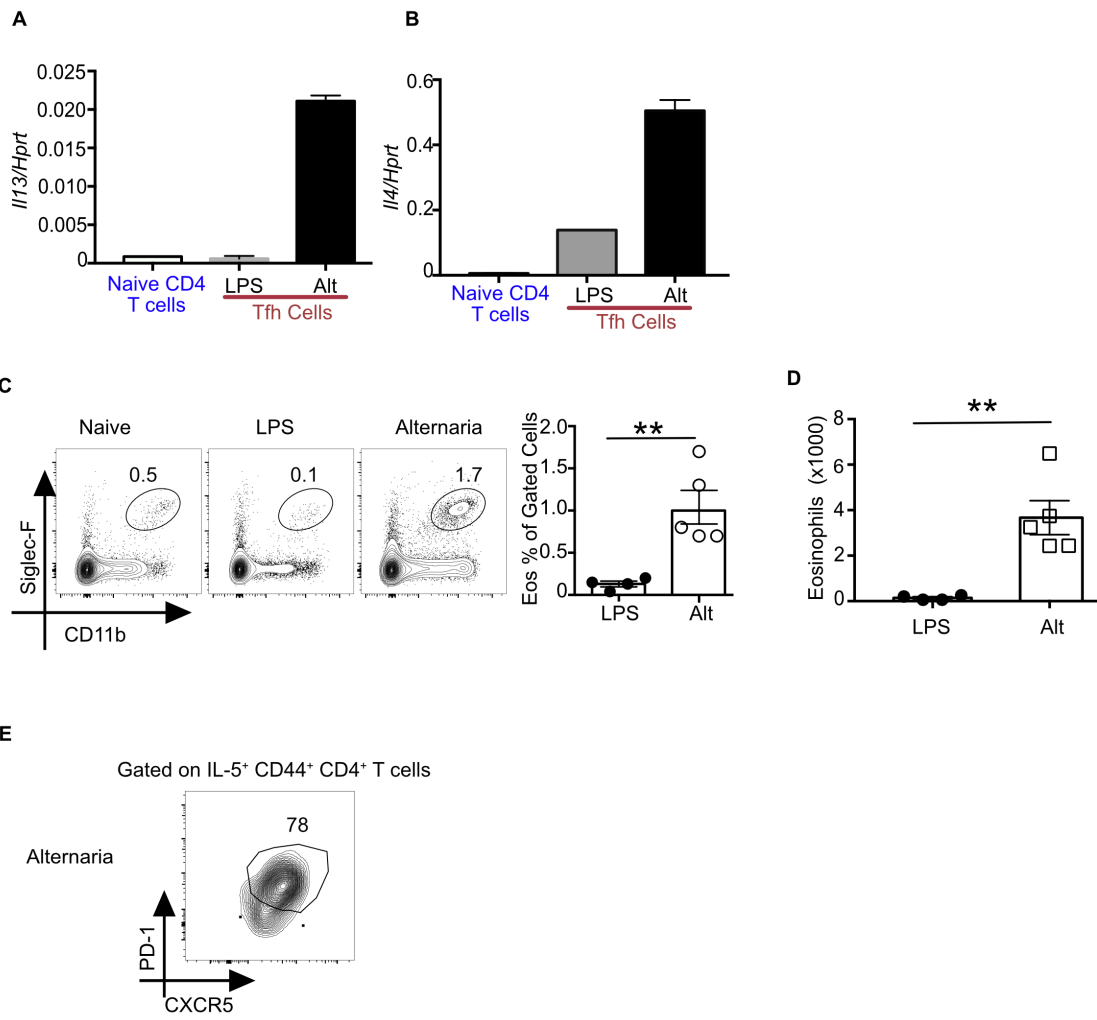

**Fig. S9. Association of Tfh13 cells and LN Eosinophils**

Day 7 Tfh cells were sorted from WT C57BL/6 mice (n=4) immunized with Alt+OVA or LPS+OVA. Cells from each immunization were pooled to obtain two biological replicates for each immunization group, and qPCR was performed with technical duplicates for (A) *Il13* and (B) *Il4* transcripts. (C) Frequency and (D) numbers of eosinophils gated on TCR $\beta$ <sup>-</sup> B220<sup>-</sup> MHC-II<sup>-</sup> CD11c<sup>-</sup> cells in the MedLN at day 8 post immunization with LPS or *Alternaria* and NP-OVA depicted as flow cytometry plots (left) and summary bar graph. (E) Representative flow cytometry plot for PD-1 and CXCR5 expression on IL-5<sup>+</sup> CD4 T cell post Alt+OVA immunization. Error bars indicate SEM. Data representative of two experiments with 4-5 mice per group. Statistical tests: Student's *t*-test (C-D). \*\**P*<0.01.

Fig. S10

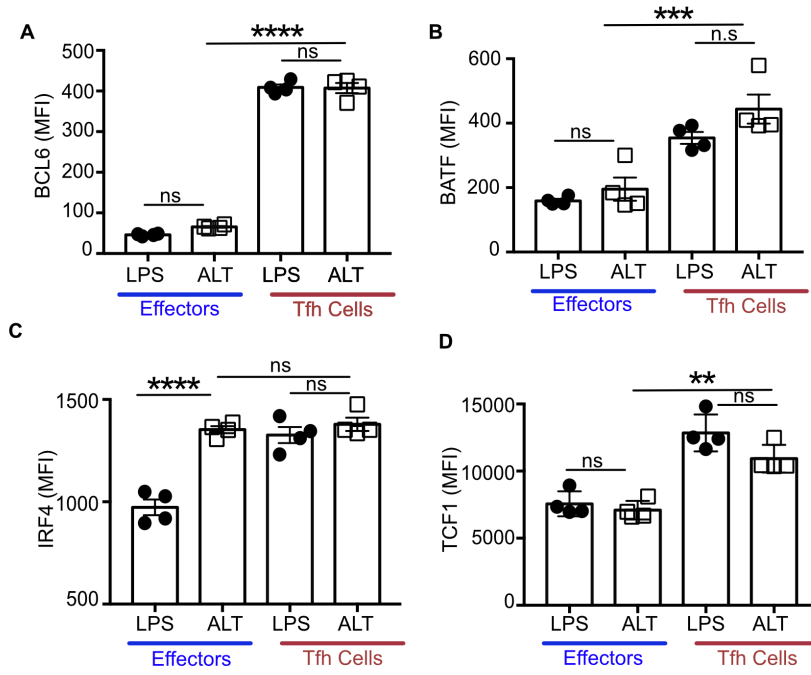

**Fig. S10. Transcription factors in Tfh cells induced to type 1 and 2 immunizations**

WT C57BL/6 mice were immunized with Alt+OVA or LPS+OVA and day 7 Tfh cells (PD-1<sup>+</sup> CXCR5<sup>+</sup>) and effectors (PD-1<sup>lo</sup> CXCR5<sup>lo</sup>) were analyzed for (A) BCL6, (B) BATF, (C) IRF4, and (D) TCF1. Each symbol indicates an individual mouse. Error bars indicate SEM. ANOVA was performed for (A-D). Data representative of two experiments with 3-4 mice per group. \* $P < 0.05$ , \*\* $P < 0.01$ , \*\*\* $P < 0.001$ , \*\*\*\* $P < 0.0001$ , and ns is not significant.

Fig. S11

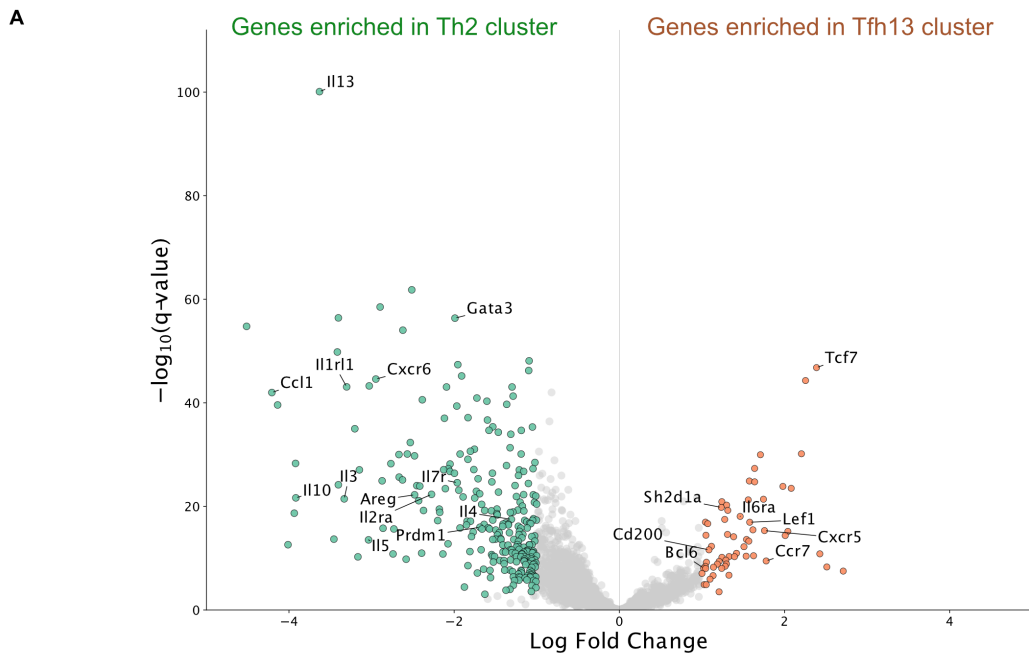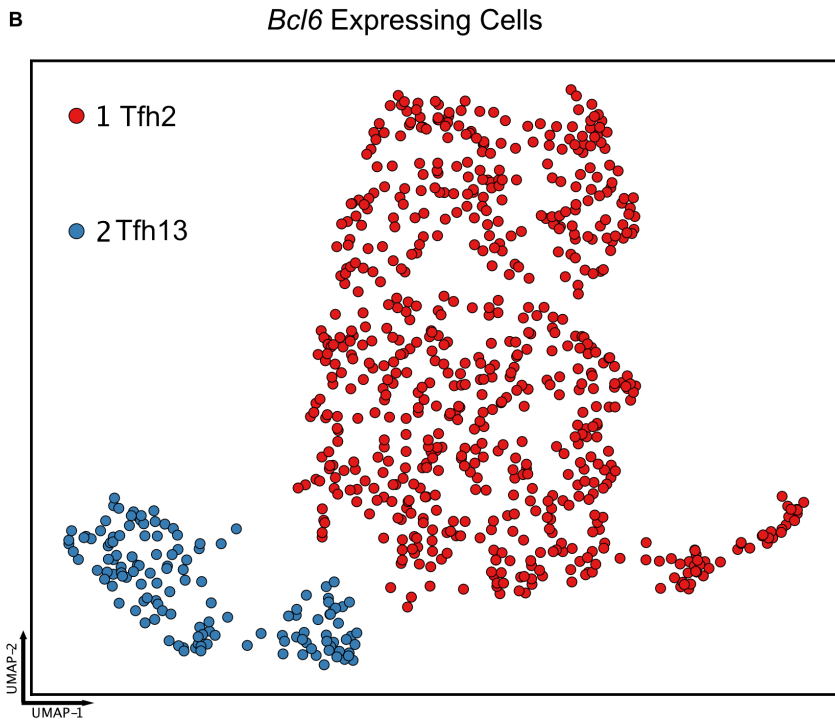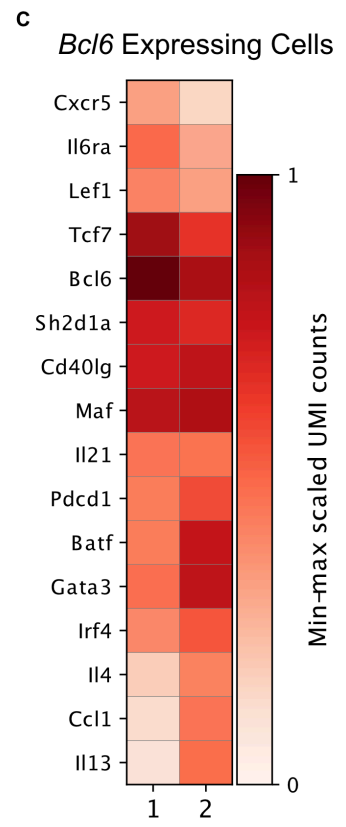

**Fig. S11. Tfh13 cells are a distinct T cell subset**

4get/*Ii4*-reporter mice were immunized intranasally (i.n.) with *Alternaria* extract and NP19-OVA. 4get<sup>+</sup> CD44<sup>+</sup> CD4 T cells were sorted and single-cell RNA sequencing analysis was performed. (A) Volcano plot showing differentially expressed genes (DEGs) between clusters 1 (Th2 cells, n=405) and 2 (Tfh13 cells, n=340) from the *Ii13*<sup>+</sup> selected cells. The horizontal axis shows the log<sub>2</sub> fold change in mean expression between the two clusters and the vertical axis shows the log<sub>10</sub> adjusted p-value (Benjamini-Hochberg correction) given by a likelihood ratio test. Genes that are more highly expressed in cluster 2 have positive log fold change. Selected statistically significant DEGs for clusters 1 and 2 are labeled. (B-C) *Bcl6*-expressing cell analyses: cells expressing 1 or more transcripts of *Bcl6* were isolated and subjected to the dimensionality reduction and clustering strategy outlined in the Materials and Methods. (B) 2D UMAP embedding of the single-cell expression profiles of n=805 *Bcl6*<sup>+</sup> T cells. Low resolution (0.1) Leiden community detection on the cell-cell k=10 nearest neighbor graph segregates the cells into two general clusters; 1: Tfh2 cells (n=668); 2: Th13 cells (n=137). (C) A matrix plot showing the expression of key marker genes that are similarly and differentially expressed between Tfh2 and Th13 cells. The color scale represents the log-transformed normalized UMI counts that have been scaled between 0 and 1 separately for each gene.



Fig. S12

A

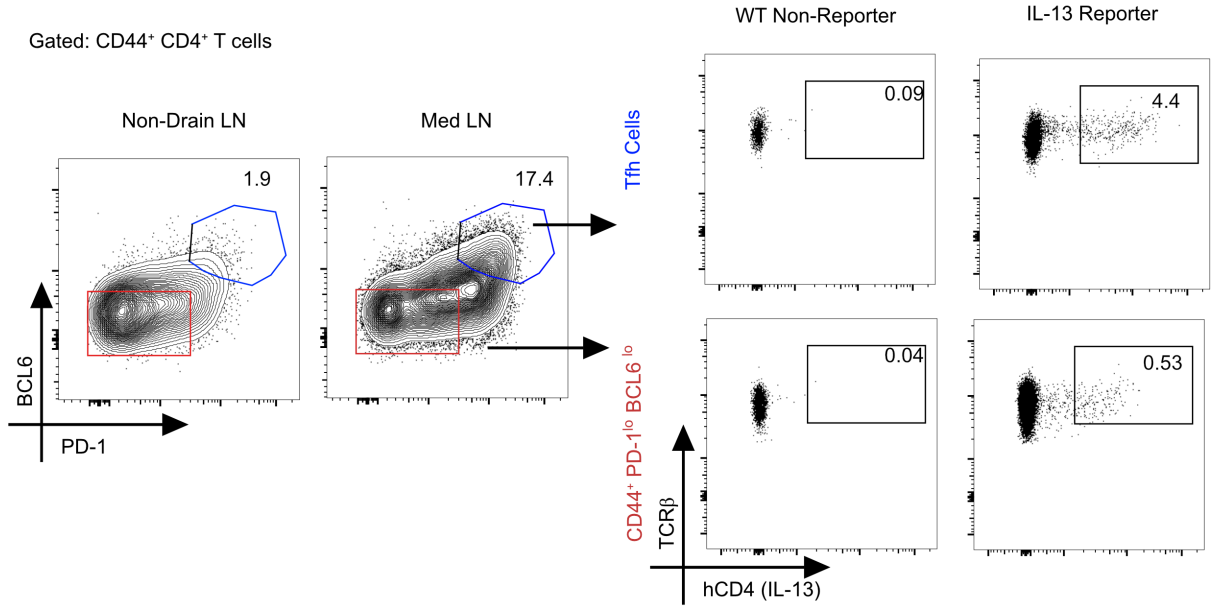

B

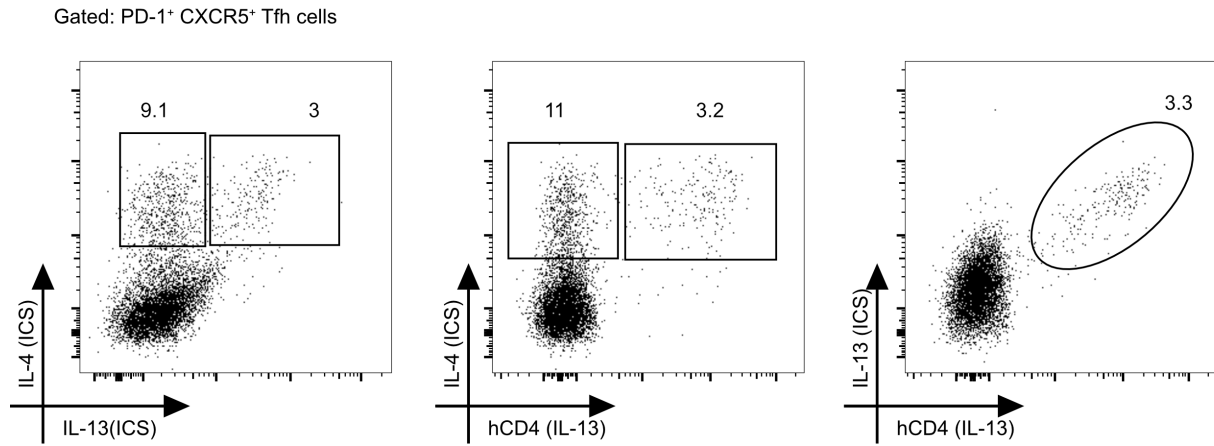

**Fig. S12. Smart13/IL-13 reporter mice validation**

Smart13/IL-13 reporter mice were immunized with *Alternaria* extract and NP19-OVA. MedLN cells were stained for Tfh markers and human CD4 (hCD4) indicative of IL-13 expression. (A) IL-13 reporter expression in Tfh cells and effectors day 3 post boost. Non-reporter mice were used as controls for the stain. (B) Comparison of hCD4 expression on day 8 Tfh cells that make IL-13 protein as measured by intracellular staining (ICS).

Fig. S13

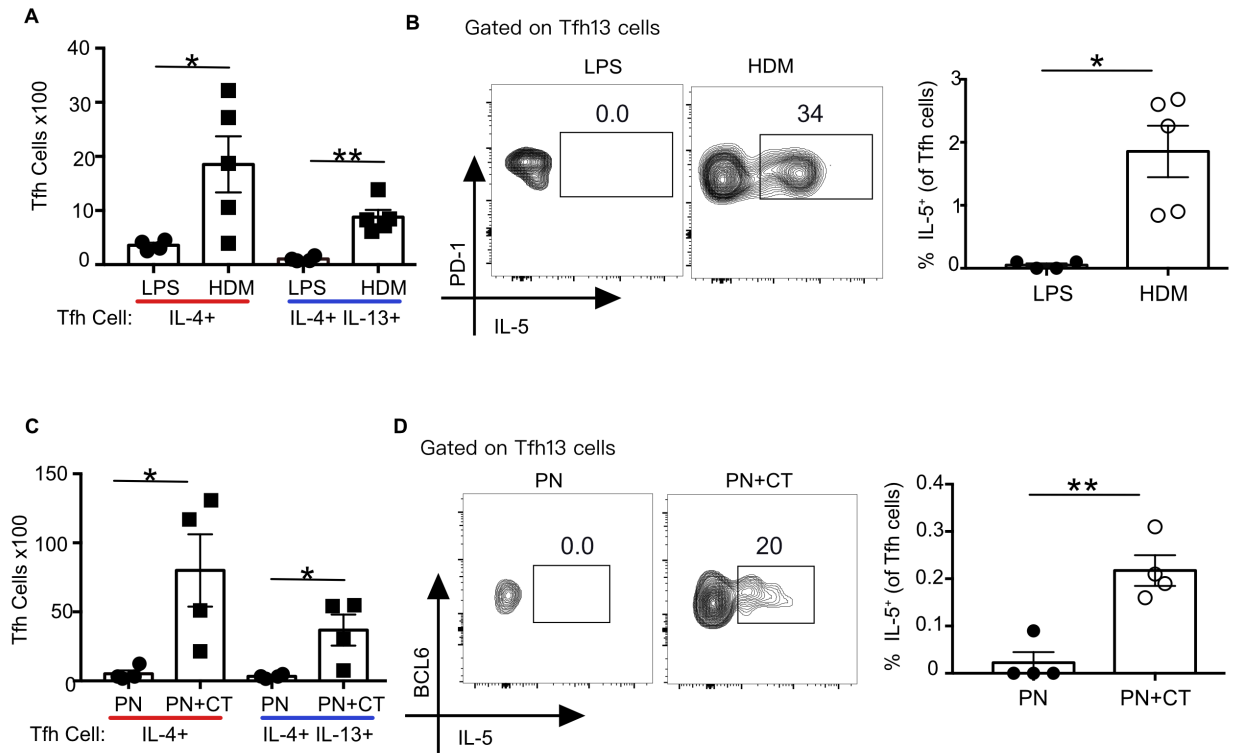

**Fig. S13. Tfh13 cells are induced to multiple allergens**

(A, B) WT C57BL/6 mice were immunized intranasally (i.n.) with LPS or HDM and NP19-OVA and intracellular expression of (A) IL-4 and IL-13 from day 8 MedLN Tfh cells induced after primary immunization is depicted as absolute counts. (B) IL-5 expression in Tfh13 cells. (C, D) WT C57BL/6 mice were intragastrically immunized with ground peanut (PN) ± cholera toxin. (C) IL-4 and IL-13 from day 8 MesLN Tfh cells induced after primary immunization is depicted as absolute counts. (D) IL-5 expression in Tfh13 cells. Each symbol indicates an individual mouse. Error bars indicate SEM. Statistical tests: Student's *t*-test (A, D); Mann–Whitney *U* test (B, C). \**P*<0.05, \*\**P*<0.01. Data representative of at least two independent experiments with 4-5 mice per group.

Fig. S14

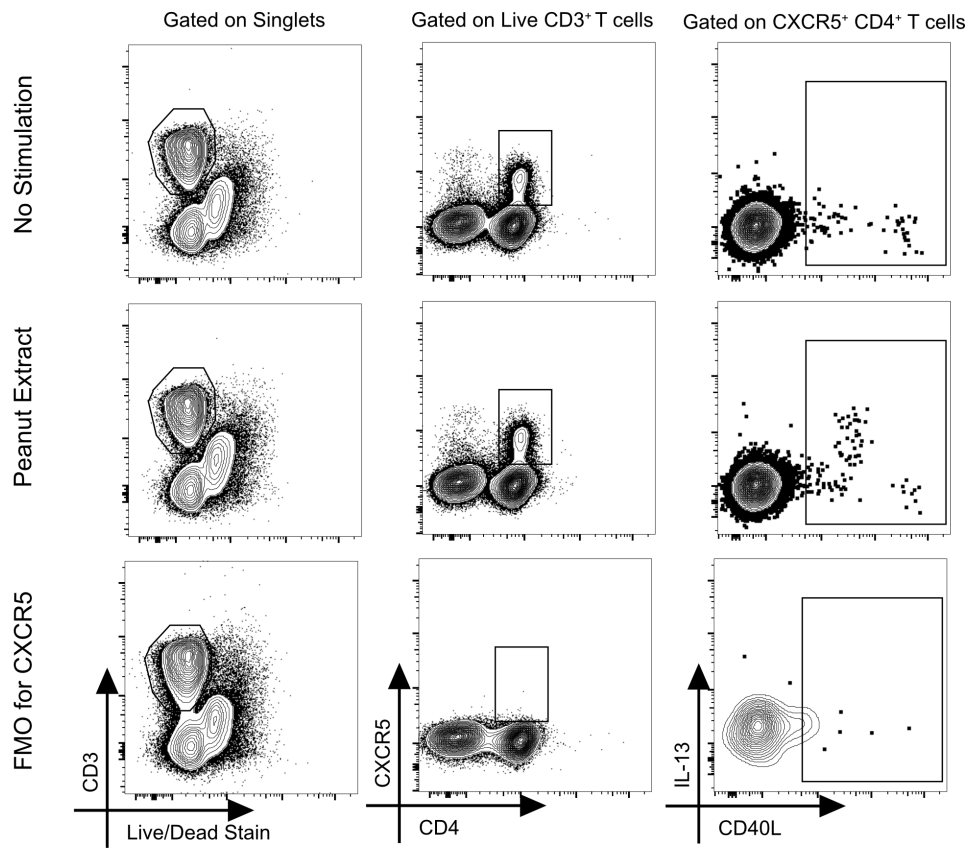

**Fig. S14. Gating strategy for peanut-specific circulating Tfh (cTfh) cells**

Representative flow plot of PBMCs from a peanut-allergic patient shown that were stimulated or not with crude peanut extract, and cTfh cells were gated as depicted. FMO, fluorescence minus one for CXCR5 demonstrates the specificity of CXCR5 staining and identification of cTfh cells.

Fig. S15

A

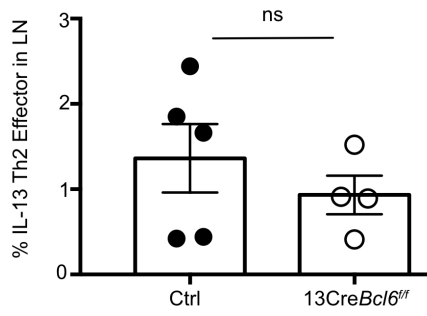

B

Gating strategy for IgE, IgG1, IgM GC B Cells

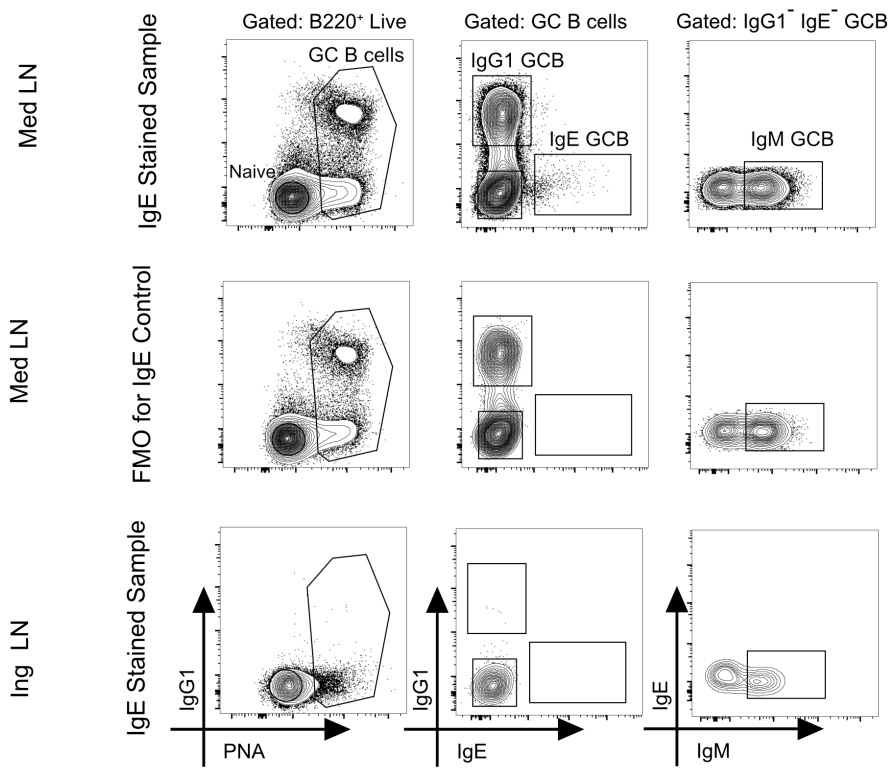

**Fig. S15. Loss of Tfh13 cells abrogates production of high-affinity IgE**

(A) Frequencies of Th2 (PD-1<sup>lo</sup> CXCR5<sup>lo</sup> IL-13<sup>+</sup> CD4 T cells) from 13Cre*Bcl6*<sup>fl/fl</sup> or control *Bcl6*<sup>fl/fl</sup> mice that were immunized with ALT+OVA on day 8 post immunization. Data representative of two experiments with 3-5 mice per group. Statistical tests: Student's *t*-test. (B) WT C57BL/6 mice were immunized intranasally (i.n.) with Alt+OVA and day 9 MedLN cells were stained for IgE, IgG1 GC B cells. Non-draining inguinal LN shown to demonstrate an unimmunized site.



Fig. S16

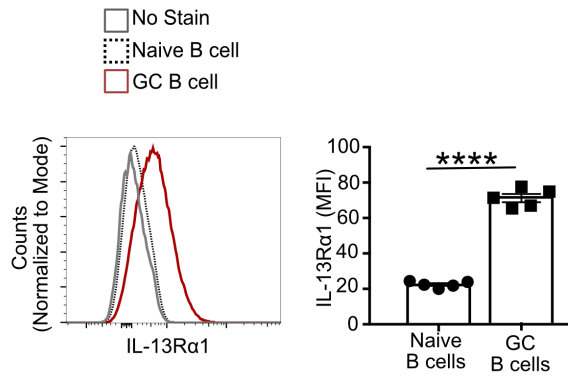

**Fig. S16. GC B cells express IL-13R $\alpha$ 1**

WT C57BL/6 mice were immunized intranasally (i.n.) with Alt+OVA. Expression of IL-13R $\alpha$ 1 on MedLN B cells at day 8 post immunization with is shown as histogram overlay (left) and as summary bar graphs (right). Data representative of two independent experiments with 3-5 mice. Statistical test: Student's *t*-test. \*\*\*\* $P < 0.0001$

## Supplementary Tables

**Table S1:** 10X Genomics scRNA-seq sequencing metrics

| Run        | 10X Chemistry | Number of Reads | Cells Captured | Median UMI Counts per Cell | Mean Reads per Cell | Median Genes per Cell | Total Genes Detected | Valid Barcodes | Sequencing Saturation | Fraction Reads in Cells |
|------------|---------------|-----------------|----------------|----------------------------|---------------------|-----------------------|----------------------|----------------|-----------------------|-------------------------|
| Tfh Sort   | V2            | 158,232,094     | 3,956          | 2,708                      | 39,998              | 1,180                 | 14,966               | 96.80%         | 79.30%                | 74.90%                  |
| IL-4+ Sort | V3            | 281,768,394     | 7,674          | 3,961                      | 36,717              | 1,514                 | 17,743               | 97.00%         | 57.60%                | 69.40%                  |

**Table S2:** 10X Genomics scRNA-seq mapping metrics

| Run        | Barcode | % Q30 Bases in |              |       | % Reads Mapped to |                |        | % Reads Mapped Confidently to |                  |                |               |
|------------|---------|----------------|--------------|-------|-------------------|----------------|--------|-------------------------------|------------------|----------------|---------------|
|            |         | RNA Read       | Sample Index | UMI   | Genome            | Antisense Gene | Genome | Intergenic Regions            | Intronic Regions | Exonic Regions | Transcriptome |
| Tfh Sort   | 98.10   | 81.40          | 97.40        | 98.30 | 94.70             | 1.60           | 90.10  | 2.70                          | 17.90            | 69.60          | 66.30         |
| IL-4+ Sort | 93.20   | 91.50          | 87.40        | 93.00 | 94.10             | 1.70           | 90.00  | 5.30                          | 18.80            | 65.90          | 62.60         |

**Table S3:** Single Cell exclusion criteria

| Run        | Total Cells | Cells passing QC | T-Cells recovered | Cells excluded by          |           |            |               |                      |
|------------|-------------|------------------|-------------------|----------------------------|-----------|------------|---------------|----------------------|
|            |             |                  |                   | HTO multiplet <sup>a</sup> | UMI count | Gene count | mtRNA content | Hemoglobin UMI count |
| Tfh Sort   | 3,956       | 3,811            | 3,002             | 126                        | 8         | 0          | 11            | 1                    |
| IL-4+ Sort | 7,674       | 4,096            | 3,863             | 1,059                      | 66        | 1,770      | 660           | 23                   |

<sup>a</sup>HTO multiplets denote cells classified as either belonging to multiple HTOs or those with too few tags to be confidently classified.

| <b>Table S4: Clinical Characteristics of Aeroallergen-sensitized Patients (for Figure 4)</b> |                  |                 |         |
|----------------------------------------------------------------------------------------------|------------------|-----------------|---------|
|                                                                                              | Allergic<br>N=13 | Control<br>N=16 | P value |
| Age-Years mean (SD)                                                                          | 10 (2.6)         | 11.2 (2.6)      | 0.23    |
| Sex Female N (%)                                                                             | 5 (38.5)         | 7 (44)          | 0.77    |
| Total IgE (kU/L) mean (SD)                                                                   | 610 (631)        | 62 (77)         | <0.05   |
| Total eosinophils (cells/uL) mean (SD)                                                       | 337 (387)        | 119.4 (92.5)    | <0.05   |
| Allergen N (%)*                                                                              |                  |                 |         |
| <i>Dermatophagoides farina</i>                                                               | 6 (46)           |                 |         |
| <i>Dermatophagoides pteronyssis</i>                                                          | 6 (46)           |                 |         |
| Dog                                                                                          | 6 (46)           |                 |         |
| Cat                                                                                          | 6 (46)           |                 |         |
| Cockroach                                                                                    | 3 (23)           |                 |         |
| Mouse                                                                                        | 2 (15)           |                 |         |
| Rat                                                                                          | 2 (15)           |                 |         |
| Mugwort                                                                                      | 1 (8)            |                 |         |
| <i>Alternaria alternata</i>                                                                  | 2 (15)           |                 |         |
| <i>Cladosporium herbarum</i>                                                                 | 0 (0)            |                 |         |

\*Percentages add to greater than 100% as some individuals were allergic to more than one allergen.

**Table S5: Antibody Clones and Dilutions**

All targets are mouse proteins except where indicated.

| Target (Clone)               | Species                                          | Fluorochrome/conjugate                    | Dilution | Source                      |
|------------------------------|--------------------------------------------------|-------------------------------------------|----------|-----------------------------|
| TCR $\beta$ (H57-597)        | Armenian Hamster<br>IgG                          | Percp/cy5.5                               | 1:300    | Biolegend                   |
|                              |                                                  | PE/Cy7                                    | 1:300    |                             |
| CD4 (GK1.5)<br>(RM4-5)       | Rat IgG <sub>2b</sub> , Rat IgG <sub>2a</sub>    | Percp/cy5.5                               | 1:400    | Biolegend                   |
|                              |                                                  | PE/Cy7                                    | 1:400    |                             |
|                              |                                                  | APC-Fire <sup>TM</sup> 750                | 1:400    | BD Bioscience               |
|                              |                                                  | PE-CF594                                  | 1:400    |                             |
| Human CD4<br>(RPA-T4)        | Mouse IgG <sub>1</sub>                           | AF647                                     | 5ul/test | Biolegend                   |
|                              |                                                  | BV605                                     | 5ul/test | Tonbo Biosciences           |
|                              |                                                  | APC-Cy7                                   | 3:100    |                             |
| CD44 (IM7)                   | Rat IgG <sub>2b</sub>                            | FITC                                      | 1:600    | Biolegend                   |
|                              |                                                  | BV605                                     | 1:600    |                             |
| CXCR5 (L138D7)<br>(2G8)      | Rat IgG <sub>2b</sub> ,<br>Rat IgG <sub>2a</sub> | Biotin                                    | 1:200    | Biolegend,<br>BD Bioscience |
|                              |                                                  | Biotin                                    | 1:150    |                             |
| PD-1 (29F.1A12)<br>(RMP1-30) | Rat IgG <sub>2a</sub> ,<br>Rat IgG <sub>2b</sub> | APC-Fire <sup>TM</sup> 750                | 1:200    | Biolegend                   |
|                              |                                                  | BV421                                     | 1:200    |                             |
|                              |                                                  | PE                                        | 1:200    |                             |
| IL-4 (11B11)                 | Rat IgG <sub>1</sub>                             | PE                                        | 1:100    | Biolegend                   |
|                              |                                                  | APC                                       | 1:100    |                             |
| IL-5 (TRFK5)                 | Rat IgG <sub>1</sub>                             | APC                                       | 1:150    | Biolegend                   |
| IL-13 (eBio13A)              | Rat / IgG <sub>1</sub>                           | PE/Cy7                                    | 1:100    | eBioscience                 |
|                              |                                                  | FITC                                      | 1:100    |                             |
| B220 (RA3-6B2)               | Rat IgG <sub>2a</sub>                            | Percp/cy5.5<br>APC-Fire <sup>TM</sup> 750 | 1:400    | Biolegend                   |
| CD19 (6D5)                   | Rat IgG <sub>2a</sub>                            | PE/Cy7                                    | 1:400    | Biolegend                   |
|                              |                                                  | FITC                                      |          |                             |
|                              |                                                  | Percp/cy5.5                               |          |                             |
| GL7                          | Rat IgM                                          | FITC<br>Percp/cy5.5                       | 1:600    | Biolegend                   |

|                               |                                                 |                         |                    |                                |
|-------------------------------|-------------------------------------------------|-------------------------|--------------------|--------------------------------|
| CD95 (Jo2)                    | Armenian Hamster<br>IgG <sub>2</sub>            | PE<br>APC               | 1:300              | BD Bioscience                  |
| CD23 (B3B4)                   | Rat IgG <sub>2a</sub>                           | PE                      | 1:400              | Biolegend                      |
| CD21/35 (7E9)                 | Rat IgG <sub>2a</sub>                           | APC                     | 1:200              | Biolegend                      |
| CD11c (N418)                  | Armenian Hamster<br>IgG                         | Pacific Blue<br>APC/Cy7 | 1:300              | Biolegend                      |
| MHC II<br>(M5/114.15.2)       | Rat IgG <sub>2b</sub>                           | BV510<br>BV412          | 1:800<br>1:800     | Biolegend                      |
| CD11b (M1/70)                 | Rat IgG <sub>2b</sub>                           | PE/Cy7                  | 1:500              | Biolegend                      |
| Va2 (B20.1)                   | Rat IgG <sub>2a</sub>                           | PB<br>PE                | 1:400<br>1:400     | Biolegend                      |
| CD103 (2E7)                   | Armenian Hamster<br>IgG                         | PE                      | 1:300              | Biolegend                      |
| CD24 (M1/69)                  | Rat IgG <sub>2b</sub>                           | PeCy7                   | 1:400              | Biolegend                      |
| CD45.1 (A20)                  | Mouse IgG <sub>2a</sub>                         | PE, APC                 | 1:200              | Biolegend                      |
| CD45.2 (104)                  | Mouse (SJL) IgG <sub>2a</sub>                   | PE, APC, PB             | 1:200              | Biolegend                      |
| Siglec-F<br>(E50-2440)        | Rat IgG <sub>2a</sub>                           | PE                      | 1:300              | BD Bioscience                  |
| GR-1 (RB6-8C5)                | Rat IgG <sub>2b</sub>                           | APC                     | 1:000              | Biolegend                      |
| ICOS (15F9)<br><br>(C398.4A)  | Syriyan Hamster IgG<br>ArmenianHamster<br>IgG   | PE<br><br>FITC          | 1:200<br><br>1:200 | Biolegend<br><br>BD Bioscience |
| GATA-3<br>(L50-823)<br>(TWAJ) | Mouse IgG <sub>1</sub><br>Rat IgG <sub>2b</sub> | Pacific Blue<br>PeCy7   | 1:50<br>1:30       | BD Bioscience<br>eBioscience   |
| Foxp3 (FJK-16s)               | Rat IgG <sub>2a</sub>                           | Pacific Blue            | 1:100              | eBioscience                    |
| IRF4 (IRF4.3E4)               | Rat IgG <sub>1</sub>                            | PE                      | 1:300              | Biolegend                      |
| BCL-6<br>(K112-91)            | Mouse IgG <sub>1</sub>                          | FITC<br>AF647           | 1:50<br>1:50       | BD Biosciences                 |
| TCF-1(C63D9)                  | Rabbit IgG                                      | Purified                | 1:200              | Cell Signaling                 |
| BATF (S39-1060)               | Mouse IgG <sub>1</sub>                          | PE                      | 1:100              | BD Biosciences                 |
| ICOS (15F9)<br><br>(C398.4A)  | Syriyan Hamster IgG<br>ArmenianHamster<br>IgG   | PE<br><br>FITC          | 1:200<br><br>1:200 | Biolegend<br><br>BD Bioscience |
| IgD (11-26c.2a)               | Rat IgG <sub>2a</sub>                           | AF647                   | 1:400              | Biolegend                      |

|                               |                          |                           |                |                      |
|-------------------------------|--------------------------|---------------------------|----------------|----------------------|
|                               |                          | Percep/cy5.5<br>AF488     | 1:300<br>1:300 |                      |
| IgG1 (A85-1)                  | Rat IgG <sub>1</sub>     | V450                      | 1:500          | BD Bioscience        |
| IgE (RME-1)                   | Rat IgG <sub>1</sub>     | FITC<br>Purified          | 1:400<br>1:30  | Biolegend            |
| CD16/CD32<br>(BD Fc Block™)   | Rat IgG <sub>2b</sub>    | Purified                  | 1:50           | BD Bioscience        |
| CD138 (281-2)                 | Rat IgG <sub>2a</sub>    | PeCy7                     | 1:300          | Biolegend            |
| IL-13R $\alpha$<br>(13MOKA)   | Rat IgG <sub>2a</sub>    | PE                        | 1:100          | Biolegend            |
| Peanut Agglutinin             |                          | Biotin                    | 1:800          | Vector Labs          |
| Viability dye aqua            |                          | 510nm<br>(Amcyan channel) | 1:1000         | Life<br>Technologies |
| Human CD3<br>(UCHT1)          | Mouse IgG <sub>1</sub>   | PerCP-Cy5.5               | 4.25:100       | Tonbo Biosciences    |
| Human CD45RA<br>(HI100)       | Mouse IgG <sub>2b</sub>  | V450                      | 2.75:100       | Tonbo Biosciences    |
| Human CXCR5<br>(RF8B2)        | Rat IgG <sub>2b</sub>    | BB515                     | 5:100          | BD Bioscience        |
| Human ICOS<br>(DX29)          | Mouse IgG <sub>1</sub>   | BV711                     | 2.4:100        | BD Bioscience        |
| Human PD-1<br>(EH12.2H7)      | Mouse IgG <sub>1</sub>   | BV605                     | 2:100          | Biolegend            |
| Human IL-4<br>(MP4-25D2)      | Rat IgG <sub>1</sub>     | PE-Cy7                    | 5:100          | Biolegend            |
| Human IL-13<br>(JES10-5A2)    | Rat IgG <sub>1</sub>     | APC                       | 5:100          | Biolegend            |
| Human IFN $\gamma$<br>(4S.B3) | Mouse IgG <sub>1</sub>   | AF700                     | 2:100          | Biolegend            |
| IgE (R35-72)<br>Elisa:capture | Rat IgG <sub>1</sub>     | Purified                  | 1:250          | BD Bioscience        |
| IgE<br>Elisa:detection        | Goat anti-mouse IgE      | HRP                       | 1:4000         | Southern Biotech     |
| IgG1<br>Elisa:detection       | Goat anti-mouse IgG1     | HRP                       | 1:6000         | Southern Biotech     |
| IgG2c<br>Elisa:detection      | Goat anti-mouse<br>IgG2c | HRP                       | 1:5000         | Southern Biotech     |
| DOCK8                         | Rabbit IgG               | Purified                  | 1:1000         | Clontech/Takara      |

|            |                               |     |        |            |
|------------|-------------------------------|-----|--------|------------|
| Rabbit IgG | Goat anti-Rabbit IgG<br>(H+L) | HRP | 1:5000 | Invitrogen |
|------------|-------------------------------|-----|--------|------------|
